# Supplementary material
Source: MDPI journal article supplement (https://www.mdpi.com/2075-163X/12/8/982)
Supplement: s1 [file s1]

Supplement material

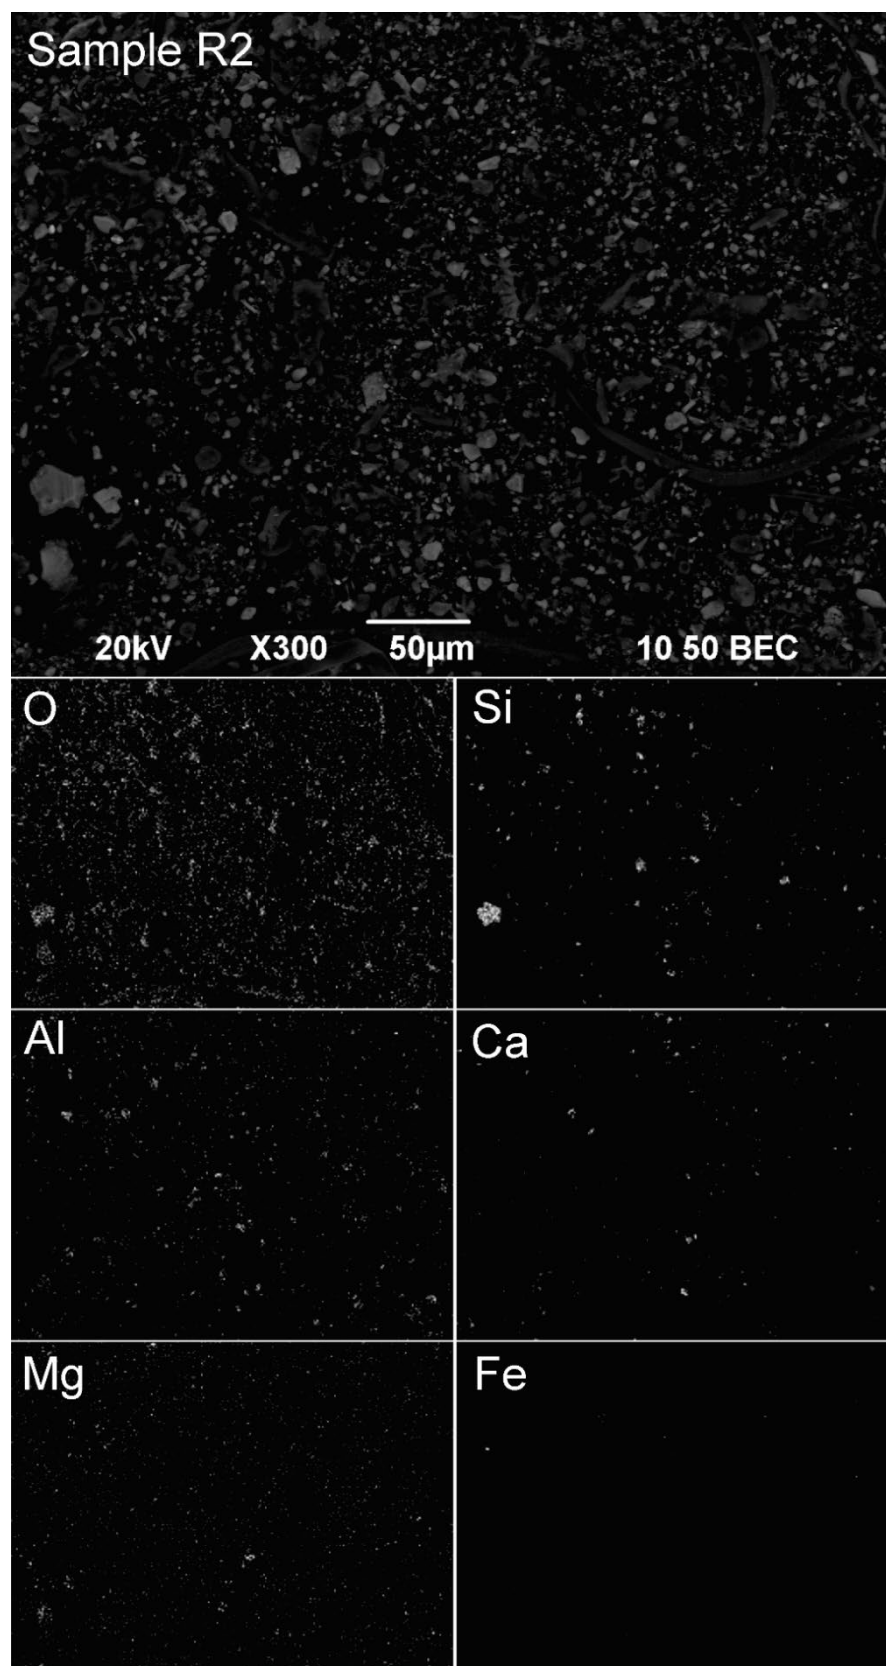

**Figure S1.** SEM field of view image with EDS elemental mapping results using 300x magnification of sample R2.

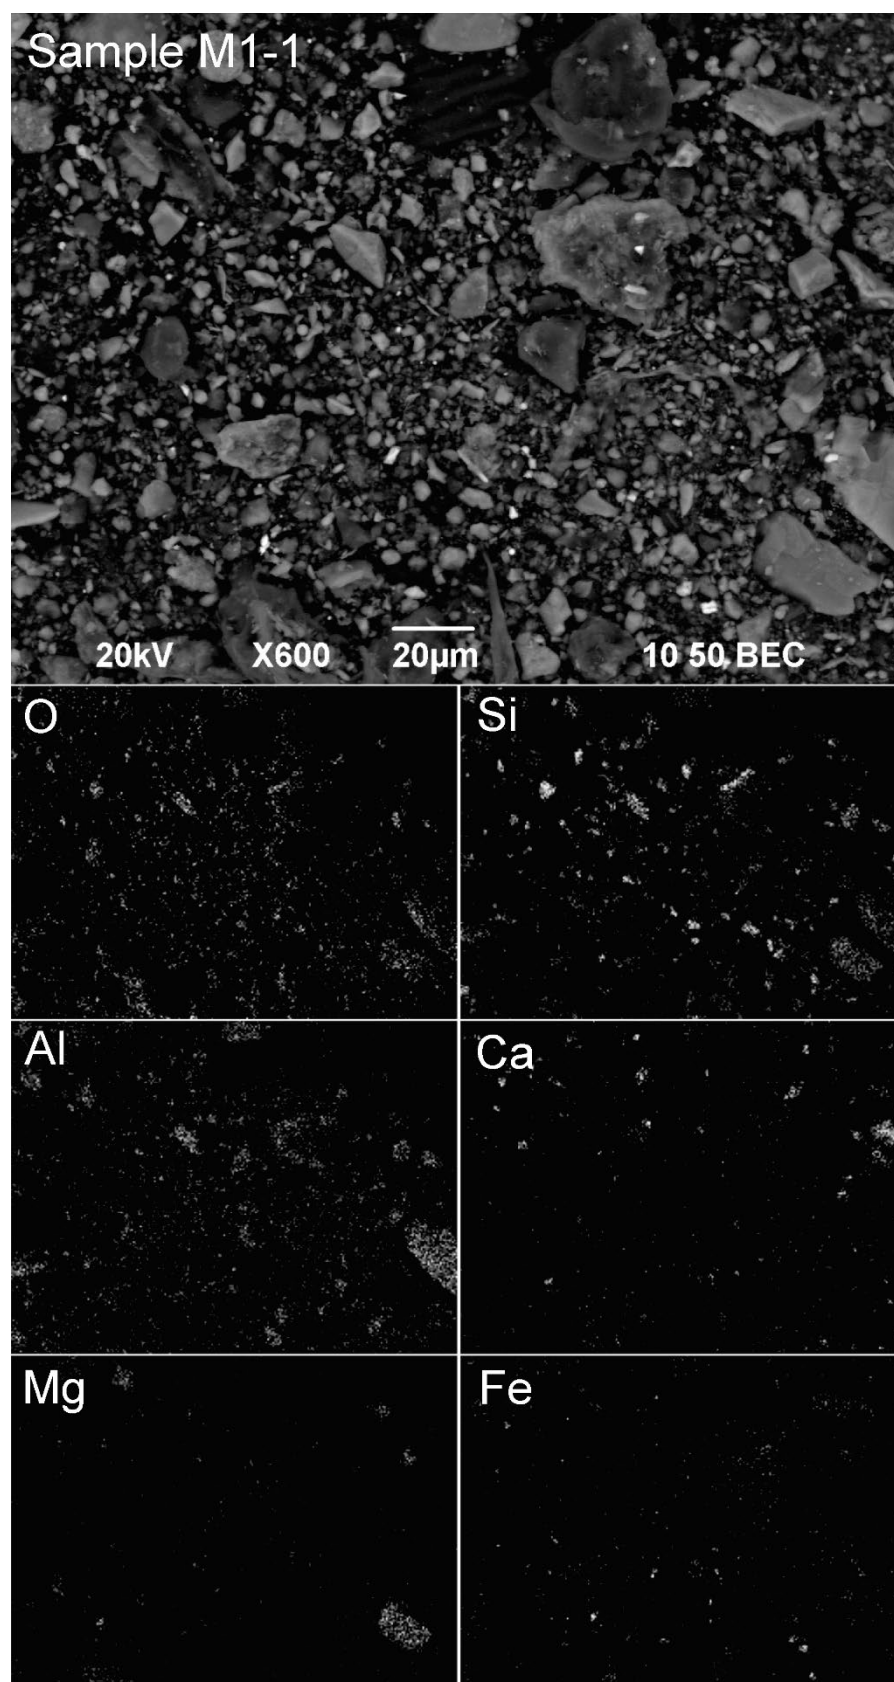

**Figure S2.** SEM field of view image with EDS elemental mapping results using 600x magnification of sample M1-1.

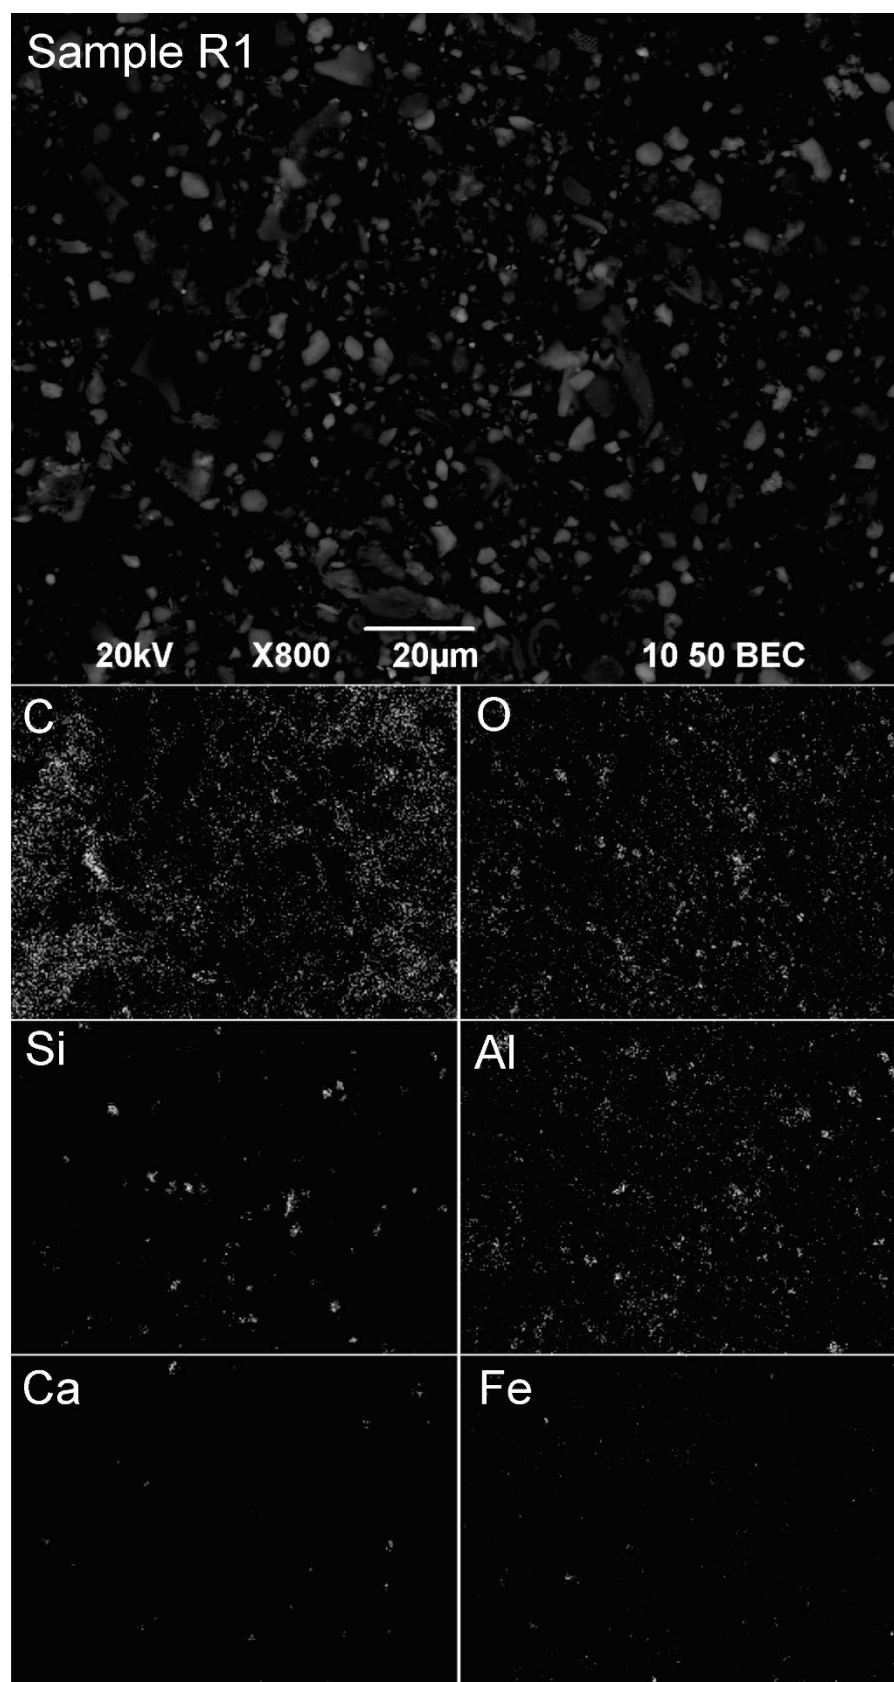

**Figure S3.** SEM field of view image with EDS elemental mapping results using 800x magnification of sample R1.



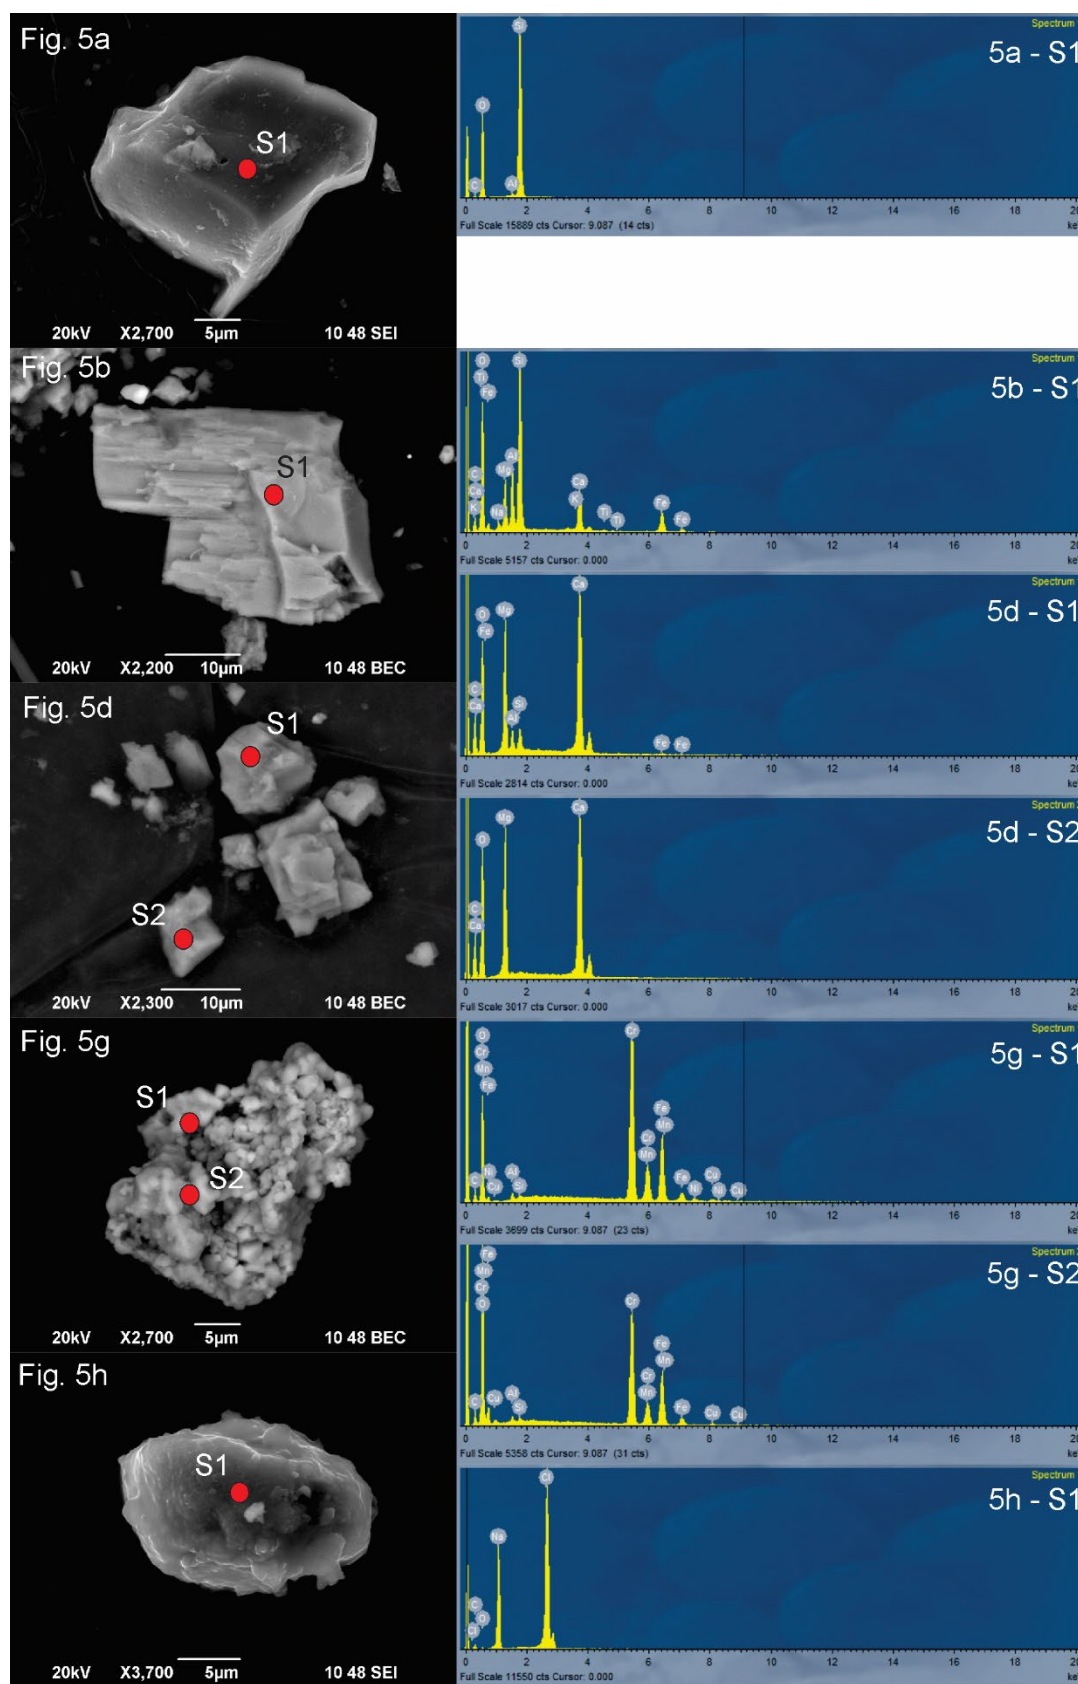

Figure S4. EDS spectra of selected images in Figure 5 (particles from passive deposition).

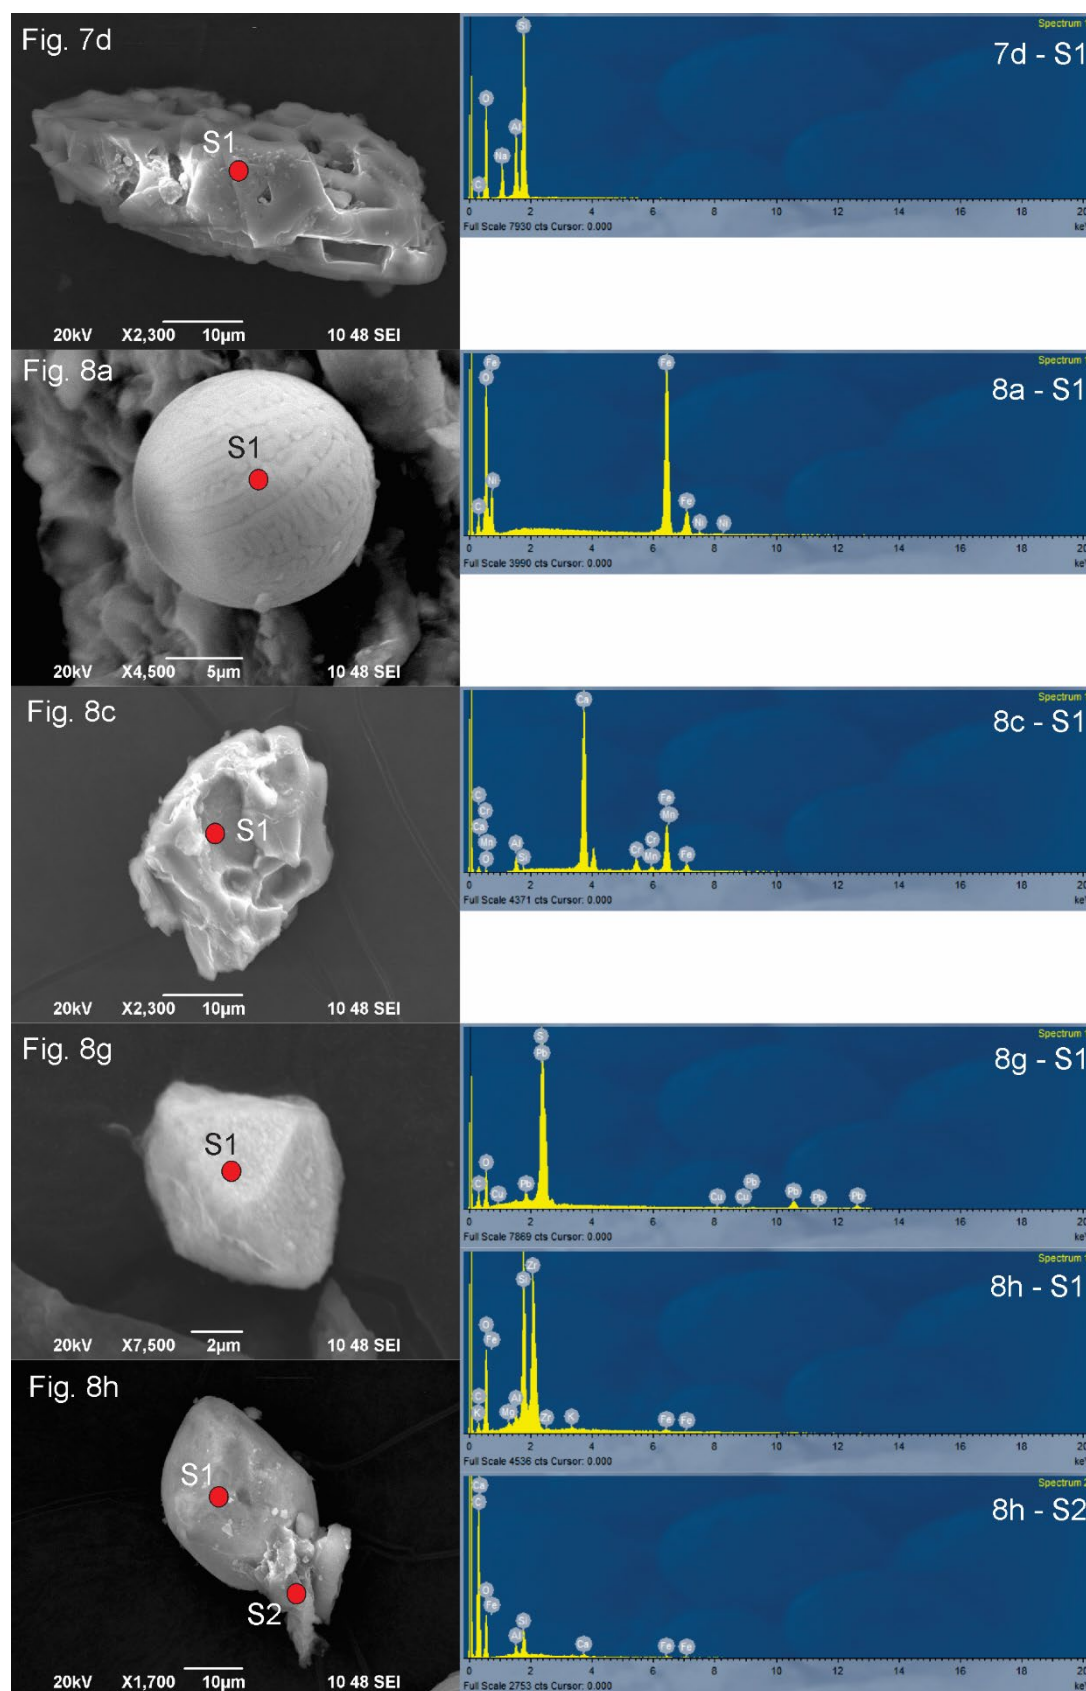

Figure S5. EDS spectra of selected images in Figures 7 and 8 (particles in snowmelt water).
